# Supplementary material for: Responses of Soil Microbiota to Different Control Methods of the Spartina alterniflora in the Yellow River Delta
Source: MDPI journal article supplement (doi:10.3390/microorganisms10061122), 2022-05-30
Supplement: s1 [file s1]

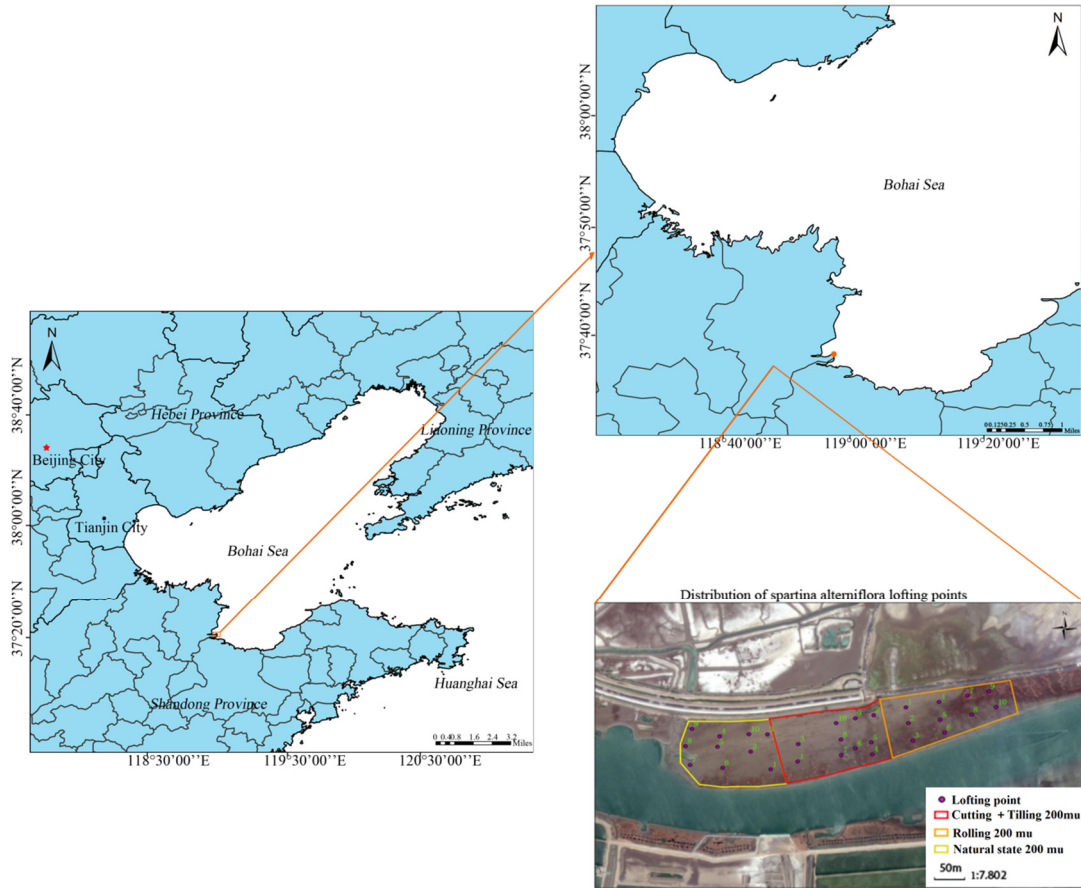

Figure S1. Location of the sampling sites.

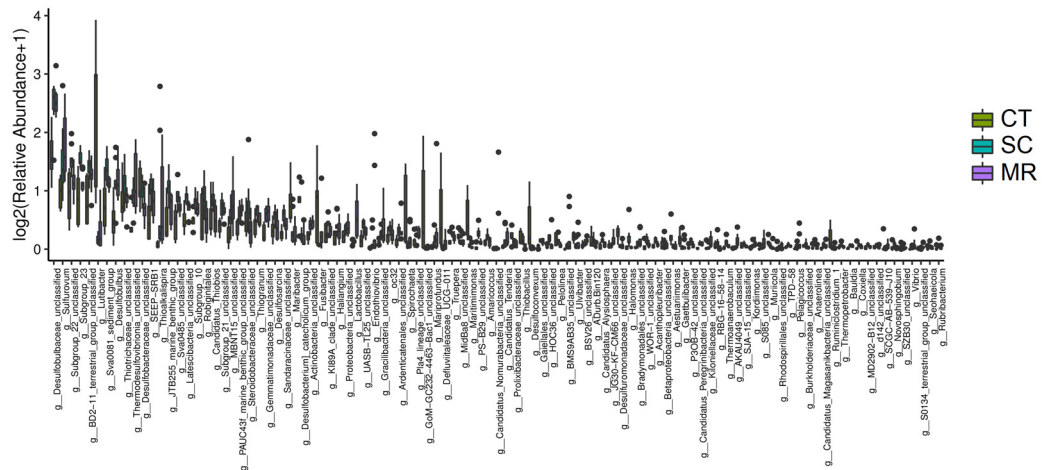

Figure S2. Diagram of bacterial taxa (at the genus level) with significant differences in relative abundance
